# Supplementary material for: Limits to the thermal tolerance of corals adapted to a highly fluctuating, naturally extreme temperature environment
Source: PubMed Central journal article supplement (PMC4667274; doi:10.1038/srep17639), 2015-12-02
Supplement: srep17639-s1.pdf [file srep17639-s1.pdf]

**Limits to the thermal tolerance of corals adapted to a highly fluctuating,  
naturally extreme temperature environment**

Verena Schoepf<sup>1,2,3,\*</sup>, Michael Stat<sup>4</sup>, James L. Falter<sup>1,2,3</sup> and Malcolm T.  
McCulloch<sup>1,2,3</sup>

<sup>1</sup> School of Earth and Environment and ARC Centre of Excellence for Coral Reef Studies,  
The University of Western Australia, Crawley, WA, Australia

<sup>2</sup> UWA Oceans Institute, The University of Western Australia, Crawley, WA, Australia

<sup>3</sup> The Western Australian Marine Science Institution, Perth, WA, Australia

<sup>4</sup> Trace and Environmental DNA (TrEnD) Laboratory, Department of Environment and  
Agriculture, Curtin University, Perth, WA, Australia

\* Corresponding author. Email: schoepf.4@osu.edu

## Supplemental Materials

**Supplemental Table S1. Results from one-way ANOVAs to test for significant differences in tank conditions between intertidal and subtidal tanks within each temperature (temp.) treatment.** df=degrees of freedom, SS=sum of squares, TA = total alkalinity,  $\Omega_{\text{arag}}$  = saturation state for aragonite.

| Variable                                  | Temp.        | df  | SS       | F-statistic | P-value |
|-------------------------------------------|--------------|-----|----------|-------------|---------|
| Day Temp.                                 | Ambient      | 1   | 0.0036   | 0.0046      | 0.9467  |
|                                           | Ambient +2°C | 1   | 0.2728   | 0.8392      | 0.3705  |
|                                           | Ambient +3°C | 1   | 0.1473   | 0.1592      | 0.6941  |
| Night Temp.                               | Ambient      | 1   | 0.0006   | 0.0012      | 0.9726  |
|                                           | Ambient +2°C | 1   | 0.2426   | 0.4478      | 0.5110  |
|                                           | Ambient +3°C | 1   | 0.0277   | 0.0241      | 0.8782  |
| $T_{\text{Heating}} - T_{\text{Control}}$ | Ambient      | n/a | n/a      | n/a         | n/a     |
|                                           | Ambient +2°C | 1   | 0.0006   | 0.0012      | 0.9728  |
|                                           | Ambient +3°C | 1   | 0.0024   | 0.0034      | 0.9541  |
| pH <sub>T</sub>                           | Ambient      | 1   | 0.0000   | 0.0059      | 0.9424  |
|                                           | Ambient +2°C | 1   | 0.0001   | 0.0678      | 0.8074  |
|                                           | Ambient +3°C | 1   | 0.0002   | 0.5294      | 0.5072  |
| pCO <sub>2</sub>                          | Ambient      | 1   | 1.3067   | 0.0004      | 0.9855  |
|                                           | Ambient +2°C | 1   | 118.1041 | 0.0834      | 0.7871  |
|                                           | Ambient +3°C | 1   | 113.7962 | 0.2112      | 0.6697  |
| TA                                        | Ambient      | 1   | 10.1140  | 0.0613      | 0.8166  |
|                                           | Ambient +2°C | 1   | 0.2166   | 0.0020      | 0.9664  |
|                                           | Ambient +3°C | 1   | 8.8088   | 0.0708      | 0.8033  |
| $\Omega_{\text{arag}}$                    | Ambient      | 1   | 0.0000   | 0.0000      | 1.0000  |
|                                           | Ambient +2°C | 1   | 0.0017   | 0.0250      | 0.8820  |
|                                           | Ambient +3°C | 1   | 0.0014   | 0.0375      | 0.8559  |
| Ammonium                                  | Ambient      | 1   | 0.0012   | 0.1370      | 0.7301  |
|                                           | Ambient +2°C | 1   | 0.0005   | 0.0232      | 0.8862  |
|                                           | Ambient +3°C | 1   | 0.0039   | 3.3611      | 0.1407  |
| Nitrate                                   | Ambient      | 1   | 0.0013   | 1.2535      | 0.3256  |
|                                           | Ambient +2°C | 1   | 0.0000   | 0.0628      | 0.8145  |
|                                           | Ambient +3°C | 1   | 0.0036   | 1.0627      | 0.3609  |
| Phosphate                                 | Ambient      | 1   | 0.0000   | 0.0672      | 0.8082  |
|                                           | Ambient +2°C | 1   | 0.0000   | 0.0240      | 0.8843  |
|                                           | Ambient +3°C | 1   | 0.0001   | 0.0723      | 0.8014  |

**Supplemental Table S2. Results from two generalized linear mixed model analyses to test for the effects of time, temperature (=Temp.), and environment (=Env.) on Fv/Fm and Qm of *Acropora aspera*. P-values  $\leq 0.05$  are highlighted in bold. Num df = numerator degrees of freedom, den df = denominator degrees of freedom.**

| <b>Effect</b>       | <b>Num df</b> | <b>Den df</b> | <b>F-statistic</b> | <b>P-value</b>    |
|---------------------|---------------|---------------|--------------------|-------------------|
| <b>Fv/Fm</b>        |               |               |                    |                   |
| Temp.               | 2             | 44            | 370.39             | <b>&lt;0.0001</b> |
| Time                | 9             | 480           | 189.50             | <b>&lt;0.0001</b> |
| Temp. x Time        | 18            | 480           | 63.41              | <b>&lt;0.0001</b> |
| Env.                | 1             | 22            | 34.45              | <b>&lt;0.0001</b> |
| Temp. x Env.        | 2             | 44            | 5.41               | <b>0.0079</b>     |
| Env. x Time         | 9             | 480           | 7.80               | <b>&lt;0.0001</b> |
| Temp. x Env. x Time | 18            | 480           | 6.51               | <b>&lt;0.0001</b> |
| <b>Qm</b>           |               |               |                    |                   |
| Temp.               | 2             | 44            | 22.05              | <b>&lt;0.0001</b> |
| Time                | 9             | 477           | 57.17              | <b>&lt;0.0001</b> |
| Temp. x Time        | 18            | 477           | 18.96              | <b>&lt;0.0001</b> |
| Env.                | 1             | 22            | 3.18               | 0.0882            |
| Temp. x Env.        | 2             | 44            | 0.33               | 0.7224            |
| Env. x Time         | 9             | 477           | 4.61               | <b>&lt;0.0001</b> |
| Temp. x Env. x Time | 18            | 477           | 5.45               | <b>&lt;0.0001</b> |

**Supplemental Table S3. Results from two generalized linear mixed model analyses to test for the effects of time, temperature (=Temp.), and environment (=Env.) on Fv/Fm and Qm of *Dipsastraea* sp. *P*-values  $\leq 0.05$  are highlighted in bold. Num df = numerator degrees of freedom, den df = denominator degrees of freedom.**

| Effect              | Num df | Den df | <i>F</i> -statistic | <i>P</i> -value |
|---------------------|--------|--------|---------------------|-----------------|
| <b>Fv/Fm</b>        |        |        |                     |                 |
| Temp.               | 2      | 36     | 45.16               | < <b>0.0001</b> |
| Time                | 9      | 485    | 176.94              | < <b>0.0001</b> |
| Temp. x Time        | 18     | 485    | 44.36               | < <b>0.0001</b> |
| Env.                | 1      | 18     | 5.88                | <b>0.0260</b>   |
| Temp. x Env.        | 2      | 36     | 3.10                | 0.0573          |
| Env. x Time         | 9      | 485    | 6.97                | < <b>0.0001</b> |
| Temp. x Env. x Time | 18     | 485    | 4.82                | < <b>0.0001</b> |
| <b>Qm</b>           |        |        |                     |                 |
| Temp.               | 2      | 36     | 21.23               | < <b>0.0001</b> |
| Time                | 9      | 485    | 23.06               | < <b>0.0001</b> |
| Temp. x Time        | 18     | 485    | 2.55                | <b>0.0005</b>   |
| Env.                | 1      | 18     | 1.64                | 0.2172          |
| Temp. x Env.        | 2      | 36     | 9.00                | <b>0.0007</b>   |
| Env. x Time         | 9      | 485    | 3.26                | <b>0.0007</b>   |
| Temp. x Env. x Time | 18     | 485    | 0.96                | 0.5091          |

**Supplemental Table S4. Results from generalized linear mixed models to test for the effects of temperature (=Temp.) and environment (=Env.) on chlorophyll *a* per area, chlorophyll *a* per cell, symbiont density (=Dens.) and tissue biomass (=Biom.) of *Acropora aspera* and *Dipsastraea* sp.** Post hoc Tukey tests were used when main effects (but no interaction terms) were significant. *P*-values  $\leq 0.05$  are highlighted in bold. Num df = numerator degrees of freedom, den df = denominator degrees of freedom. NB=ambient control, BL=ambient +2°C, BH=ambient+3°C. IT=Intertidal, ST=subtidal.

| Factor                          | Effect       | Num df | Den df | <i>F</i> -statistic | <i>P</i> -value   | Tukey            |
|---------------------------------|--------------|--------|--------|---------------------|-------------------|------------------|
| <i>Acropora aspera</i>          |              |        |        |                     |                   |                  |
| Chl <i>a</i> area <sup>-1</sup> | Temp.        | 2      | 13     | 55.22               | <b>&lt;0.0001</b> |                  |
|                                 | Env.         | 1      | 22     | 2.45                | 0.1317            |                  |
|                                 | Temp. x Env. | 2      | 13     | 6.07                | <b>0.0137</b>     |                  |
| Chl <i>a</i> cell <sup>-1</sup> | Temp.        | 2      | 13     | 9.26                | <b>0.0032</b>     |                  |
|                                 | Env.         | 1      | 22     | 1.10                | 0.3055            |                  |
|                                 | Temp. x Env. | 2      | 13     | 4.60                | <b>0.0308</b>     |                  |
| Dens.                           | Temp.        | 2      | 13     | 44.95               | <b>&lt;0.0001</b> | NB > BL=BH       |
|                                 | Env.         | 1      | 22     | 4.36                | <b>0.0486</b>     | IT > ST          |
|                                 | Temp. x Env. | 2      | 13     | 1.23                | 0.3233            |                  |
| Biom.                           | Temp.        | 2      | 13     | 2.40                | 0.1294            |                  |
|                                 | Env.         | 1      | 22     | 0.52                | 0.4778            |                  |
|                                 | Temp. x Env. | 2      | 13     | 2.44                | 0.1264            |                  |
| <i>Dipsastraea</i> sp.          |              |        |        |                     |                   |                  |
| Chl <i>a</i> area <sup>-1</sup> | Temp.        | 2      | 36     | 110.72              | <b>&lt;0.0001</b> | NB > BL=BH       |
|                                 | Env.         | 1      | 18     | 9.64                | <b>0.0061</b>     | IT > ST          |
|                                 | Temp. x Env. | 2      | 36     | 0.19                | 0.8297            |                  |
| Chl <i>a</i> cell <sup>-1</sup> | Temp.        | 2      | 36     | 5.72                | <b>0.0069</b>     | NB=BH ><br>BH=BL |
|                                 | Env.         | 1      | 18     | 0.04                | 0.8392            |                  |
|                                 | Temp. x Env. | 2      | 36     | 0.17                | 0.8481            |                  |
| Dens.                           | Temp.        | 2      | 36     | 65.42               | <b>&lt;0.0001</b> | NB > BL=BH       |
|                                 | Env.         | 1      | 18     | 9.17                | <b>0.0072</b>     | IT > ST          |
|                                 | Temp. x Env. | 2      | 36     | 0.78                | 0.4667            |                  |
| Biom.                           | Temp.        | 2      | 36     | 0.47                | 0.6275            |                  |
|                                 | Env.         | 1      | 18     | 7.42                | <b>0.0139</b>     | IT > ST          |
|                                 | Temp. x Env. | 2      | 36     | 0.26                | 0.7736            |                  |

**Supplemental Table S5. Results from generalized linear mixed models to test for the effects of temperature (=Temp.) and environment (=Env.) on chlorophyll  $c_2$  per area and chlorophyll  $c_2$  per cell of *Acropora aspera* and *Dipsastraea* sp.** Post hoc Tukey tests were used when main effects (but no interaction terms) were significant. *P*-values  $\leq 0.05$  are highlighted in bold. Num df = numerator degrees of freedom, den df = denominator degrees of freedom. NB=ambient control, BL=ambient+2°C, BH=ambient+3°C. IT=Intertidal, ST=subtidal.

| Factor                       | Effect       | Num df | Den df | <i>F</i> -statistic | <i>P</i> -value   | Tukey      |
|------------------------------|--------------|--------|--------|---------------------|-------------------|------------|
| <i>Acropora aspera</i>       |              |        |        |                     |                   |            |
| Chl $c_2$ area <sup>-1</sup> | Temp.        | 2      | 13     | 39.22               | <b>&lt;0.0001</b> | NB > BL=BH |
|                              | Env.         | 1      | 21     | 16.27               | <b>0.0006</b>     | IT > ST    |
|                              | Temp. x Env. | 2      | 13     | 3.46                | 0.0625            |            |
| Chl $c_2$ cell <sup>-1</sup> | Temp.        | 2      | 13     | 10.78               | <b>0.0017</b>     |            |
|                              | Env.         | 1      | 21     | 2.50                | 0.1288            |            |
|                              | Temp. x Env. | 2      | 13     | 6.81                | <b>0.0095</b>     |            |
| <i>Dipsastraea</i> sp.       |              |        |        |                     |                   |            |
| Chl $c_2$ area <sup>-1</sup> | Temp.        | 2      | 35     | 52.96               | <b>&lt;0.0001</b> | NB > BL=BH |
|                              | Env.         | 1      | 18     | 5.89                | <b>0.0259</b>     | IT > ST    |
|                              | Temp. x Env. | 2      | 35     | 1.30                | 0.2858            |            |
| Chl $c_2$ cell <sup>-1</sup> | Temp.        | 2      | 35     | 0.78                | 0.4681            |            |
|                              | Env.         | 1      | 18     | 3.82                | 0.0664            |            |
|                              | Temp. x Env. | 2      | 35     | 0.74                | 0.4850            |            |

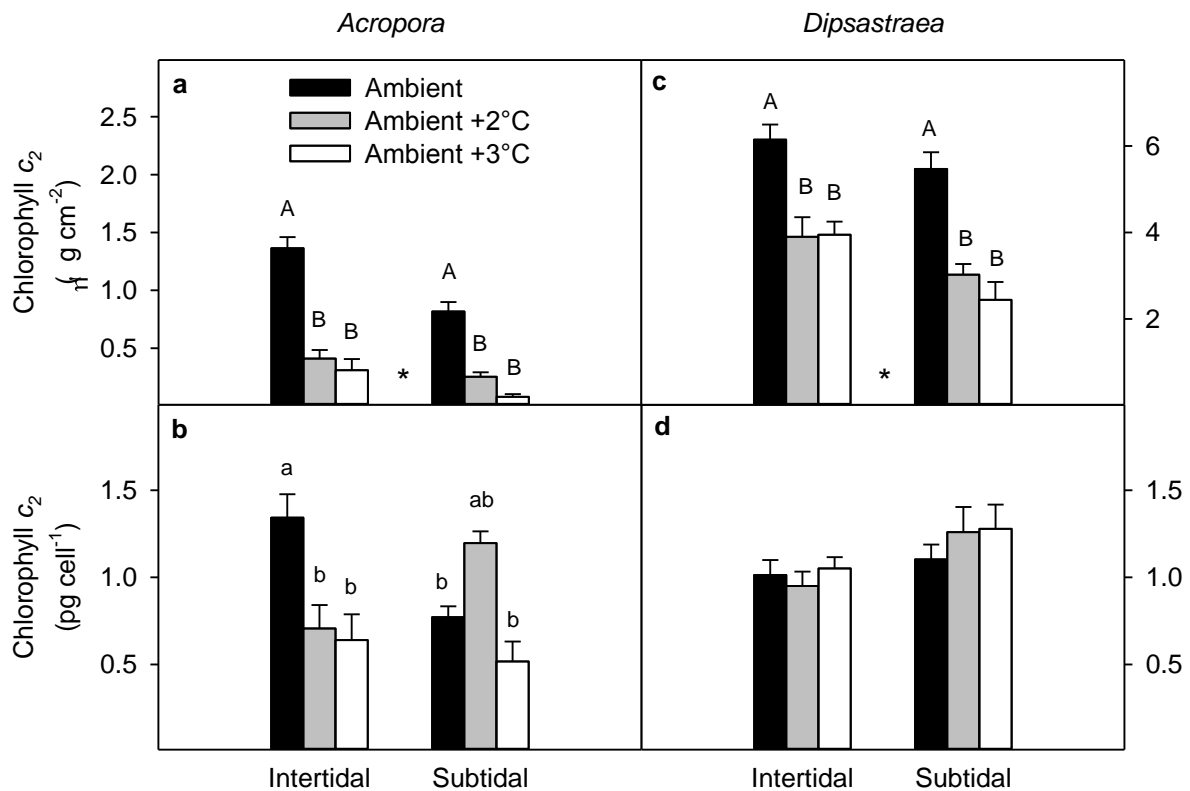

**Supplemental Figure S1. Chlorophyll  $c_2$  normalized to (a, c) surface area and (b, d) symbiont cells of intertidal and subtidal *Acropora aspera* and *Dipsastraea* sp.** Mean  $\pm$  SE are shown. Asterisks indicate significant effects of environment, whereas upper case letters indicate significant temperature effects. Lower case letters indicate results from Tukey-adjusted multiple pairwise comparisons when there was a significant interaction between environment and temperature. Statistical results in Table S5. Note the different scales for the two corals in panels a and c.
